# Supplementary material for: Promoting the growth of rice and reducing the accumulation of Cd in rice by pig bedding derived carbon dots (PBCDs) under Cd stress
Source: Royal Society of Chemistry journal article supplement (doi:10.1039/d4en00682h), 2024-11-14
Supplement: d4en00682h1.pdf [file d4en00682h1.pdf]

## Supporting Information

### S1. Supplemental Methods

#### *S1.1 Determination of phytohormones*

Fresh rice leaves (0.20 g) were immersed in 2 mL pre-chilled 80% methanol solution and extracted at 4°C in a refrigerator for 12 h. After centrifugation at 4500 rpm for 10 mins at 4°C, the supernatant was collected and filtered through a 0.22 µm nylon membrane. The phytohormone content in the leaves was determined using HPLC-DAD method (Agilent 1260, USA). A ZORBAX SB-C18 chromatographic column (4.6 mm × 150 mm, 5 µm) was employed with a mobile phase of methanol: water: acetic acid = 45:50:5. The elution was performed isocratically with an injection volume of 10 µL, a flow rate of 1 mL·min<sup>-1</sup>, and a column temperature of 30°C. Detection of endogenous hormone content changes in leaves was carried out at a wavelength of 254 nm.

### S2. Results

#### *S2.1 Effect of PBCDs on phytohormones*

Under Cd-0 treatment, different concentrations of PBCDs can increase the levels of GA3, 6-BA, and IAA, with the exception of ABA (Fig. S1). Notably, the most significant increases in GA3 and IAA were observed at a spraying concentration of 250 mg·L<sup>-1</sup>, showing increments of 46.11% and 27.62%, respectively. 6-BA reached its highest increase under the PS500 treatment, with a rise of 15.36%. Typically associated with plant growth inhibition, ABA exhibited an exceptional increase of 4.25% under the PS1000 treatment. Generally, ABA showed a decreasing trend across other treatments, indicating that foliar application of PBCDs did not induce significant stress responses.

Under Cd-5 stress, different endogenous hormones play critical roles in rice plants, the foliar application of various concentrations of PBCDs led to an upregulation of GA3, 6-BA, IAA, and ABA compared to the control group. GA3 levels increased by 18.69% to 74.31% in many treatments (Fig. S1A), except for the PS50 treatment, where no significant was observed compared to the control. 6-BA, which plays a crucial role in regulating plant growth and development, increased in rice leaves under Cd stress with appropriate concentrations of PBCDs. Compared to PS0, the concentration of 6-BA significantly increased by 1.82% ~ 9.36% under the PS50, PS100, and PS500 treatments. Conversely, the PS1000 and PS250 treatments exhibited decreases of 6.04% and 1.66%, possibly due to variations in leaves Cd content. The trend of IAA changes largely mirrored that of gibberellin. After different PBCDs treatments, IAA levels increased by 49.24% ~128.98% (Fig. S1C). ABA,

plays a crucial role in the response to Cd stress, it was found that ABA decreased by 4.59% ~ 8.23% under the PS50, PS250, and PS1000 treatments, while the PS100 and PS500 treatments led to increases of 7.83% and 1.58%, respectively (Fig. S1D). Overall, our results demonstrate that PBCDs can modulate defense-related phytohormone to mitigate Cd toxicity.

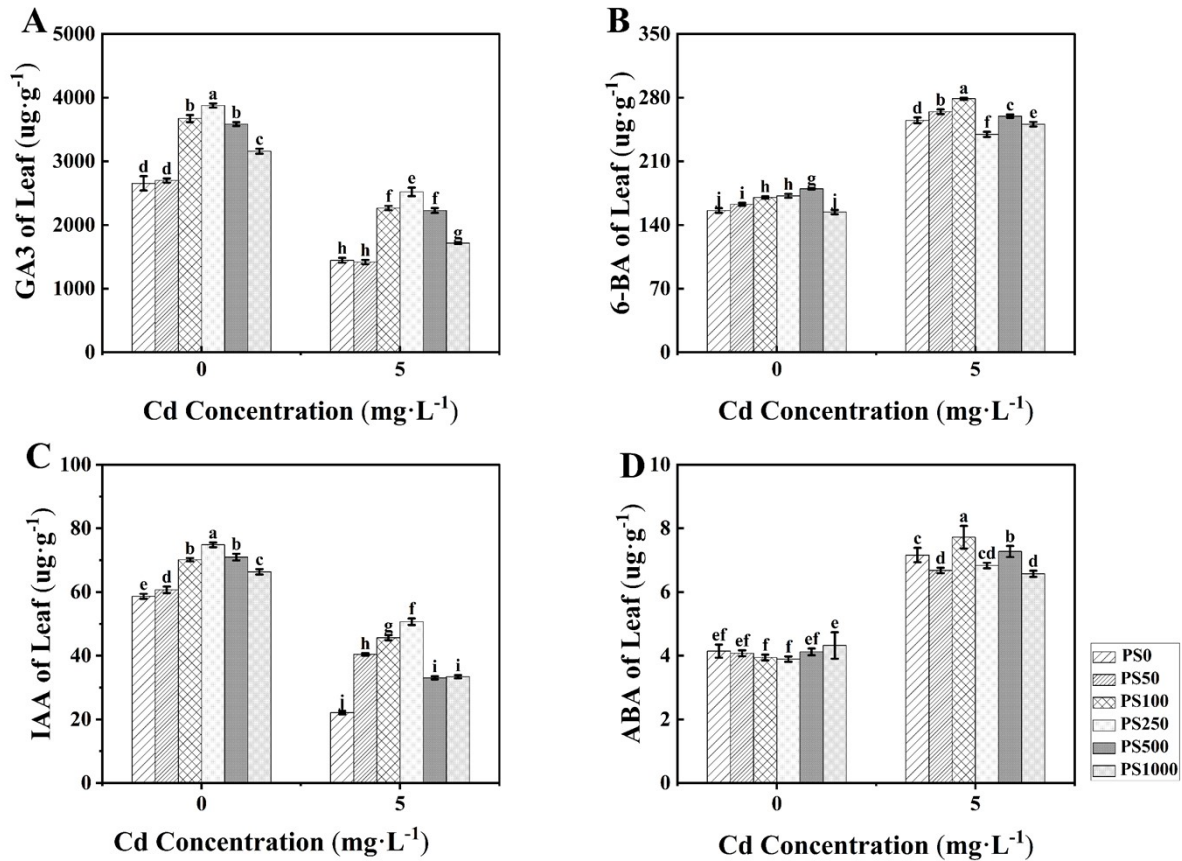

Fig. S1. Effects of PBCDs on phytohormones in rice leaves. A) GA3, B) 6-BA, C) IAA, D) ABA. Bars represent standard deviation ( $\pm$  SD) of the means ( $n = 3$ ). Treatments marked with different letters are significantly different at  $P < 0.05$ .

Table S1 The influence of PBCDs on the length of shoots and roots in rice under Cd-0 treatment (cm)

| PBCDs Concentration (mg·L <sup>-1</sup> ) | 0                  | 50                | 100               | 250                | 500                | 1000               |
|-------------------------------------------|--------------------|-------------------|-------------------|--------------------|--------------------|--------------------|
| Shoot length                              | 65.59 $\pm$ 1.15a  | 64.68 $\pm$ 2.17a | 65.49 $\pm$ 2.13a | 64.32 $\pm$ 0.46a  | 63.26 $\pm$ 0.42ab | 59.98 $\pm$ 0.76b  |
| Root length                               | 25.40 $\pm$ 0.10ab | 26.84 $\pm$ 1.29a | 22.72 $\pm$ 1.27b | 23.09 $\pm$ 0.76ab | 23.61 $\pm$ 1.73ab | 24.20 $\pm$ 1.82ab |

Note: Bars represent standard deviation ( $\pm$  SD) of the means ( $n = 3$ ). Treatments marked with different letters are significantly different at  $P < 0.05$ .

Table S2 The influence of PBCDs on the length of shoots and roots in rice under Cd-5 treatment (cm)

| PBCDs Concentration (mg·L <sup>-1</sup> ) | 0             | 50              | 100            | 250            | 500           | 1000           |
|-------------------------------------------|---------------|-----------------|----------------|----------------|---------------|----------------|
| Shoot length                              | 43.30 ± 1.55a | 45.10 ± 0.80a   | 45.38 ± 1.00a  | 45.55 ± 1.80a  | 44.87 ± 1.33a | 45.09 ± 1.01a  |
| Root length                               | 16.61 ± 1.06c | 19.03 ± 0.62abc | 21.67 ± 2.49ab | 21.79 ± 1.43ab | 22.28 ± 1.21a | 18.41 ± 1.38bc |

Note: Bars represent standard deviation (± SD) of the means (n = 3). Treatments marked with different letters are significantly different at  $P < 0.05$ .

Table S3 The influence of PBCDs on organic acid content in rice roots under Cd-0 treatment (μg·g<sup>-1</sup>)

| PBCDs Concentration (mg·L <sup>-1</sup> ) | 0                 | 50                | 100               | 250               | 500               | 1000             |
|-------------------------------------------|-------------------|-------------------|-------------------|-------------------|-------------------|------------------|
| OA                                        | 943.77 ± 142.61a  | 752.11 ± 76.19ab  | 468.56 ± 229.45b  | 102.33 ± 81.10c   | 552.92 ± 53.20b   | 523.15 ± 65.85b  |
| TA                                        | 4423.28 ± 319.55a | 4370.78 ± 566.90a | 4055.50 ± 545.71a | 3603.90 ± 352.63a | 2452.33 ± 288.68b | 844.35 ± 237.96c |
| CA                                        | 1539.04 ± 206.31a | 1374.88 ± 35.51a  | 1322.72 ± 316.15a | 1321.20 ± 61.98a  | 326.36 ± 102.98b  | 1487.78 ± 105.49 |
| FA                                        | 189.70 ± 29.58b   | 210.96 ± 6.96b    | 193.68 ± 7.43b    | 253.13 ± 15.49a   | 129.33 ± 6.83c    | 190.56 ± 12.52b  |
| SA                                        | 549.32 ± 76.31b   | 690.60 ± 57.94a   | 497.53 ± 59.08b   | 704.55 ± 41.81a   | 324.12 ± 7.13c    | 487.18 ± 66.86b  |
| AA                                        | 383.62 ± 37.86bc  | 568.52 ± 31.15b   | 585.19 ± 62.40b   | 513.63 ± 63.00b   | 848.06 ± 119.29a  | 279.13 ± 139.12c |
| PA                                        | 1061.69 ± 54.84b  | 1179.69 ± 159.29b | 683.13 ± 97.40c   | 1578.28 ± 196.11a | 397.92 ± 75.08c   | 691.65 ± 132.01c |

Note: OA (Oxalic Acid), TA (Tartaric Acid), CA (Citric Acid), FA (Fumaric Acid), SA (Succinic Acid), AA (Acetic Acid), PA (Propionic Acid). Bars represent standard deviation (± SD) of the means (n = 3). Treatments marked with different letters are significantly different at  $P < 0.05$ .

Table S4 The influence of PBCDs on organic acid content in rice roots under Cd-5 treatment (μg·g<sup>-1</sup>)

| PBCDs Concentration (mg·L <sup>-1</sup> ) | 0                  | 50                 | 100                | 250                | 500                 | 1000               |
|-------------------------------------------|--------------------|--------------------|--------------------|--------------------|---------------------|--------------------|
| OA                                        | 1387.76 ± 118.99bc | 1664.12 ± 153.14ab | 1806.87 ± 130.37a  | 1290.89 ± 132.75c  | 1484.54 ± 244.98abc | 1493.28 ± 65.57abc |
| TA                                        | 6623.04 ± 966.46a  | 6732.77 ± 1110.49a | 7718.29 ± 934.98a  | 6565.71 ± 1408.01a | 8379.65 ± 1257.67a  | 6403.73 ± 1151.78a |
| CA                                        | 1377.33 ± 107.67c  | 2141.38 ± 392.48b  | 1547.82 ± 120.81c  | 2690.03 ± 68.70a   | 2534.95 ± 248.67ab  | 1592.83 ± 131.84c  |
| FA                                        | 115.92 ± 24.70c    | 263.88 ± 61.94a    | 235.51 ± 43.17ab   | 174.02 ± 13.05bc   | 207.12 ± 35.46ab    | 167.16 ± 14.85bc   |
| SA                                        | 321.45 ± 29.97b    | 292.14 ± 96.80c    | 264.74 ± 60.29c    | 341.06 ± 22.13bc   | 469.97 ± 38.78a     | 442.54 ± 32.89ab   |
| AA                                        | 439.16 ± 45.86c    | 926.64 ± 97.15ab   | 1159.63 ± 3657.79a | 579.19 ± 128.52bc  | 621.37 ± 80.62bc    | 498.04 ± 66.08c    |
| PA                                        | 612.89 ± 109.67bc  | 934.43 ± 149.72a   | 741.81 ± 65.36ab   | 355.46 ± 28.43d    | 953.35 ± 45.81a     | 466.56 ± 121.86cd  |

Note: OA (Oxalic Acid), TA (Tartaric Acid), CA (Citric Acid), FA (Fumaric Acid), SA (Succinic Acid), AA (Acetic Acid), PA (Propionic Acid). Bars represent standard deviation (± SD) of the means (n = 3). Treatments marked with different letters are significantly different at  $P < 0.05$ .

Table S5 The influence of PBCDs on phenolic acid content in rice roots under Cd-0 treatment  
( $\mu\text{g}\cdot\text{g}^{-1}$ )

| PBCDs Concentration ( $\text{mg}\cdot\text{L}^{-1}$ ) | 0                   | 50                  | 100                 | 250                 | 500                 | 1000                |
|-------------------------------------------------------|---------------------|---------------------|---------------------|---------------------|---------------------|---------------------|
| GA                                                    | 14.10 $\pm$ 0.68a   | 14.83 $\pm$ 0.23a   | 18.88 $\pm$ 4.56a   | 13.54 $\pm$ 0.96a   | 12.47 $\pm$ 4.62a   | 11.46 $\pm$ 1.24a   |
| NCGA                                                  | 3.84 $\pm$ 1.23ab   | 3.05 $\pm$ 2.06ab   | 3.13 $\pm$ 1.21ab   | 6.23 $\pm$ 1.29a    | 3.29 $\pm$ 0.37ab   | 2.71 $\pm$ 0.98b    |
| p-HBA                                                 | 1.82 $\pm$ 0.38a    | 1.56 $\pm$ 0.32a    | 1.33 $\pm$ 0.69a    | 1.37 $\pm$ 0.55a    | 2.37 $\pm$ 0.42a    | 2.82 $\pm$ 1.04a    |
| VA                                                    | 8.17 $\pm$ 0.59a    | 9.09 $\pm$ 0.08a    | 7.77 $\pm$ 0.60a    | 5.85 $\pm$ 0.97b    | 4.58 $\pm$ 0.93b    | 4.68 $\pm$ 1.17b    |
| SYA                                                   | 24.54 $\pm$ 3.33b   | 30.74 $\pm$ 3.38a   | 26.38 $\pm$ 1.86ab  | 18.08 $\pm$ 2.24c   | 17.78 $\pm$ 1.30c   | 17.34 $\pm$ 2.33c   |
| p-CA                                                  | 8.10 $\pm$ 0.71a    | 4.76 $\pm$ 0.64b    | 4.77 $\pm$ 0.92b    | 3.20 $\pm$ 0.55c    | 2.30 $\pm$ 0.11c    | 1.79 $\pm$ 0.30c    |
| FA                                                    | 93.55 $\pm$ 13.36ab | 112.92 $\pm$ 8.40a  | 75.07 $\pm$ 11.17b  | 106.01 $\pm$ 8.09a  | 36.67 $\pm$ 7.68c   | 78.35 $\pm$ 6.49b   |
| BA                                                    | 176.8 $\pm$ 38.1abc | 289.27 $\pm$ 38.05a | 170.91 $\pm$ 59.3bc | 263.06 $\pm$ 75.0ab | 119.71 $\pm$ 34.84c | 118.79 $\pm$ 27.02c |
| CinA                                                  | 4.16 $\pm$ 0.19a    | 4.33 $\pm$ 4.21a    | 4.07 $\pm$ 0.17a    | 4.33 $\pm$ 0.16a    | 4.15 $\pm$ 0.09a    | 4.03 $\pm$ 0.16a    |

Note: GA (Gallic acid), NCGA (Neochlorogenic Acid), p-HBA (p-Hydroxybenzoic acid), SYA (syringic acid), p-CA (p-Coumaric acid), FA (Ferulic acid), BA (Benzoic acid), CinA (Cinnamic acid). Bars represent standard deviation ( $\pm$  SD) of the means ( $n = 3$ ). Treatments marked with different letters are significantly different at  $P < 0.05$ .

Table S6 The influence of PBCDs on phenolic acid content in rice roots under Cd-5 treatment  
( $\mu\text{g}\cdot\text{g}^{-1}$ )

| PBCDs Concentration ( $\text{mg}\cdot\text{L}^{-1}$ ) | 0                  | 50                  | 100                 | 250                 | 500                 | 1000               |
|-------------------------------------------------------|--------------------|---------------------|---------------------|---------------------|---------------------|--------------------|
| GA                                                    | 11.92 $\pm$ 1.40c  | 12.49 $\pm$ 0.44bc  | 14.87 $\pm$ 2.00ab  | 12.55 $\pm$ 0.79bc  | 15.43 $\pm$ 0.86a   | 10.13 $\pm$ 0.76c  |
| NCGA                                                  | 11.36 $\pm$ 1.52c  | 17.78 $\pm$ 0.13ab  | 19.33 $\pm$ 1.57a   | 15.08 $\pm$ 1.42bc  | 20.17 $\pm$ 1.18a   | 15.31 $\pm$ 2.22bc |
| p-HBA                                                 | 1.91 $\pm$ 0.39b   | 2.35 $\pm$ 0.45ab   | 2.57 $\pm$ 0.17ab   | 2.04 $\pm$ 0.52b    | 2.00 $\pm$ 0.21b    | 3.36 $\pm$ 0.97a   |
| VA                                                    | 8.48 $\pm$ 0.78c   | 9.85 $\pm$ 0.63abc  | 12.90 $\pm$ 1.23a   | 12.02 $\pm$ 2.69ab  | 9.66 $\pm$ 0.70bc   | 9.27 $\pm$ 1.33bc  |
| SYA                                                   | 26.56 $\pm$ 4.21ab | 32.02 $\pm$ 2.96a   | 30.37 $\pm$ 4.21ab  | 23.06 $\pm$ 12.25ab | 25.10 $\pm$ 2.45ab  | 17.02 $\pm$ 2.47b  |
| p-CA                                                  | 15.77 $\pm$ 0.88ab | 15.16 $\pm$ 1.76ab  | 18.76 $\pm$ 3.09a   | 15.09 $\pm$ 1.74c   | 14.07 $\pm$ 1.74ab  | 10.58 $\pm$ 2.32b  |
| FA                                                    | 192.0 $\pm$ 31.51b | 290.60 $\pm$ 25.46a | 313.52 $\pm$ 30.36a | 121.31 $\pm$ 17.83c | 110.71 $\pm$ 30.87c | 61.9 $\pm$ 16.22c  |
| BA                                                    | 55.51 $\pm$ 6.02a  | 72.55 $\pm$ 2.54a   | 58.46 $\pm$ 6.06a   | 32.09 $\pm$ 5.07b   | 66.13 $\pm$ 13.21a  | 62.76 $\pm$ 4.89a  |
| CinA                                                  | 5.67 $\pm$ 1.07a   | 7.43 $\pm$ 1.10a    | 7.75 $\pm$ 0.99a    | 7.41 $\pm$ 0.91a    | 7.12 $\pm$ 0.19a    | 6.49 $\pm$ 1.60a   |

Note: GA (Gallic acid), PCA (protocatechuic acid), p-HBA (p-Hydroxybenzoic acid), VA (Vanillic Acid), SYA (syringic acid), VAN (Vanillin), p-CA (p-Coumaric acid), FA (Ferulic acid), BA (Benzoic acid), CinA (Cinnamic acid). Bars represent standard deviation ( $\pm$  SD) of the means ( $n = 3$ ). Treatments marked with different letters are significantly different at  $P < 0.05$ .
